# Supplementary figures and images for: Development of Pomegranate Peel Extract and Nano ZnO Co-Reinforced Polylactic Acid Film for Active Food Packaging
Source: MDPI journal article supplement (doi:10.3390/membranes12111108), 2022-11-06

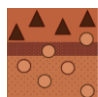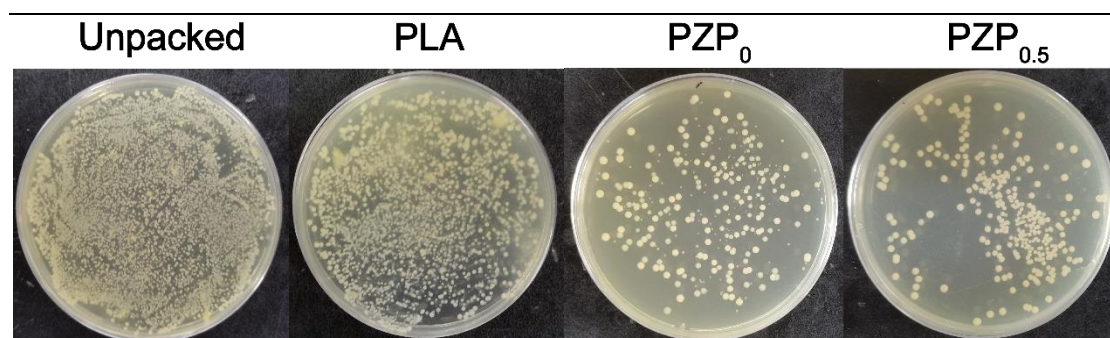

**Figure S1.** Plate count results of 15-day cherry tomatoes from four groups

Supplement: s1 [file s1]
